# Supplementary material for: The physics of fault friction: Insights from experiments on simulated gouges at low shearing velocities
Source: Copernicus journal article supplement (doi:10.5194/se-2020-85), 2020-06-08
Supplement: Supplementary file [file se-2020-85-AC1-supplement.pdf]

## **REPLY TO COMMENTS BY REVIEWER #1 SE-2020-85**

Below we pasted the reviewers' comments, with in red our reply to each comment made. Where applicable we indicate how/ where a comment has been addressed by referring to line and figure numbers in the revised manuscript (ms).

### **Anonymous Referee #1**

Received and published: 13 July 2020

Dear Editor, I have reviewed the paper entitled "The physics of fault friction: insight from experiments on simulated gouges at low shearing velocities" by Verberne et al., as a potential article to be published in Solid Earth. I start by saying that this is a review article and does not contain any new results. The authors summarize a vast amount of work that has been carried out in the last 20 years or more at the Utrecht University rock mechanics laboratory. The main focus of this review is to give the reader a general overview of the development, and the current state-of-the-art, including strengths and limitations, of the CNS (Chen-Niemeijer-Spiers) microphysical model for fault friction and the earthquake cycle that is based on experimental evidences derived from experiments performed at the Utrecht laboratory. The review is well organized, in fact the authors start by clearly describe the experimental facilities used to perform the experiments, then they summarize some case studies that have put the basis for the formulation of CNS model. Afterwards, they describe the theoretical foundation of the model validating it with a comparison with the experimental data. Finally, they discuss the CNS model as applied to earthquakes simulation with a comparison with Rate and State- Friction (RSF) constitutive equations that is the most used framework so far. Throughout the review, the authors make the appropriate references to direct the reader to the relevant papers that have been published regarding the various aspect of the development of the CNS model. The papers are all in very good journals and highly cited so that the scientific basis for this model is not under discussion. In general the paper is very well written and organized and the figures are appropriate and it represent a necessary step to summarize the work done in developing this model. For these reasons I recommend publication after the authors address some minor concerns as listed below.

We thank the reviewer for his/her constructive review, which has helped to improve the quality of the ms.

Comments to the authors:

General: A minor aspect, but it should absolutely improve, regards the figures. From figure 3 throughout figure 10, they look like screen shots taken from the cited articles. This is true to the point that in figure 3 is impossible to read the text in the different figure panels. I strongly recommend the authors to produce high quality figures.

We fully agree that the figure quality in the .pdf version of the submitted ms was inadequate. We suspect that this may have occurred upon rendering a merged version of the ms. To ensure the best quality figures in the final manuscript, each figure as been re-exported from their original format (.ai or .cdr) to .jpg format, at 300 DPI resolution. In addition, we have increased the overall quality of each figure by adjusting text within, adopting a uniform style (font type, size, etc.), and by improving the figure captions.

I think that one aspect that should be improved in this review, since in the single papers cited is poorly addressed, is the relation between the CNS model and its physical basis with the interpretation of the mechanical work related to dilation as it was developed by Marone et al., 1990 JGR and Beeler et al., 1996 JGR. In particular they interpret the velocity dependence of friction (v-strengthening or weakening) based on an energy balance of the work done against

the normal stress (i.e. dilation rate) and relate it with the degree of shear localization. This basis are very similar to the CNS model. However, something that is not very clear to me is that in the observations of Marone and Beeler velocity perturbations that lead to fault dilation are associated with velocity strengthening frictional behavior, and shear localization is associated with velocity weakening behavior. While in the CNS model increasing in porosity leads to velocity weakening and “localization” by ductile mechanisms to velocity strengthening. Those experiments were conducted on crystalline material such as quartz or granite and the CNS model was developed for calcite that notably undergoes IPS. Can the authors implement some comments about these models?

This is an interesting point raised by the reviewer, which we are happy to discuss. The interpretation of the mechanisms controlling fault gouge shear deformation offered by Marone et al. (1990) and Beeler et al. (1996) is rooted in observations of fault strength, velocity dependence, and dilatation, from experiments on simulated quartz(-rich) gouges. The correlations between the data reported are intriguing indeed, and the interpretations offered stimulating -as recognized from the important work that was directly or indirectly inspired by it (see e.g., Segall and Rice, 1995; Scruggs and Tullis, 1998; Sleep et al., 2000; Samuelson et al., 2009). However, the Marone/ Beeler model is based on an intuitive assumption or hypothesis, which, while inspiring and broadly consistent with trends seen in their experimental data, has no explicit physical or thermodynamic origin.

Quoting Beeler et al. (1996), “*Marone et al. [1990] hypothesized that the friction velocity dependence of simulated gouge is the sum of the friction velocity dependence of bare surfaces and the velocity dependence of dilation rate*”. The CNS model re-evaluates the role of contact friction and dilation, using an established energy balance approach. In effect, the CNS model assumes that gouge shear resistance is caused by energy consumed in driving i) grain boundary friction (equivalent to ‘bare surface friction’ of Marone et al.) and ii) dilatation. However, net (i.e. measured) dilatation, constant in the case of steady-state sliding, is the result of competition between porosity increase caused by rate-insensitive granular flow (characterised by a dilatancy angle) and intergranular compaction by time-dependent creep processes (such as IPS mentioned by the reviewer - though the same principles apply for any creep mechanism). In the Marone/ Beeler model, intergranular creep processes are ignored, which means that dilatation is artificially assumed to be shear rate dependent and always leads to an increase in porosity. If this increase occurs faster than the rate at which pore fluid can flow in, the pore fluid pressure will decrease, leading to an increase in effective normal stress and so-called ‘dilatancy strengthening’ (Segall and Rice, 1995; Samuelson et al., 2009). While the latter is relevant especially in the case of transients, micro- and nanostructural observations, as well as compaction phenomena occurring during slide-hold-slide experiments, for example, clearly demonstrate an important role of creep mechanisms in friction experiments, suggesting that their incorporation in models for shear of gouge-filled faults represents a key step towards capturing physical reality.

Regarding the inferred relation between shear strain localization and velocity weakening behaviour, we further note that there is little microstructural evidence of any systematic nature to support this. When examined with a microscope, sheared gouges usually show a localized shear band structure regardless whether the mechanical data implies velocity strengthening or -weakening behaviour (see Verberne et al., 2013, 2015, 2019; Niemeijer, 2018). However, in view of the major differences between our experiments and those of Marone/Beeler and co-workers (i.e., materials investigated, P-T-v conditions employed), it is perhaps not realistic to expect full agreement of the results. More work is needed on fault gouge microstructure development and its relation with sliding velocity, normal stress, and displacement. Until this is clarified, care should be taken when interpreting a relation between fault mechanical properties and gouge microstructure.

To address the reviewers' comment, in the revised ms we now include a brief statement on the important findings regarding the role of dilatation reported by Marone et al. (1990), and on the subsequent modelling work that was derived from it (lines 138-142). While we acknowledge the seminal impact of the work by Marone et al (1990) and Beeler et al al (1996), we feel that a detailed comparison with the CNS model would be too lengthy to include in the present ms

Specific:

L39: "Seismic fault motion of this type" it is not very clear to me. The authors refer to many fault slip styles in the previous sentence, so I would rephrase maybe with "the full spectrum of slip behaviors".

OK. We were referring to 'slow slip and earthquakes', mentioned in the preceding sentence. We have now clarified this accordingly by rephrasing (line 40).

L84-91: About the frictional-viscous mechanism. I would avoid to generalize too much such mechanism as active at crustal scale everywhere as it reads now in the text. It is true that from the outcrop observation of ancient subduction zones and some phyllosilicate-rich faults (e.g. Fagereng et al., 2014; Collettini et al., 2011 these references may be added to the text) this behavior can be inferred as at play. However, this is not true for all the fault zones and I think that it is not appropriate to generalize it. Alternatively, it should be specified that the seismogenic zone refer only to subduction zones here.

We acknowledge that the wording in the original ms was somewhat overconfident here. Part of the 'problem' is the use of the term 'frictional-viscous' which, through time, has received the connotation referred to by the reviewer, as being associated with subduction megathrusts or phyllosilicate-rich faults. However, our intention is much broader than this. In particular, recent observations demonstrate that concurrent brittle/frictional-plastic deformation is widespread in nanogranular fault rocks.

To address the reviewers' point, we now write (lines 85-93)

"Within the seismogenic zone and shallower, field and laboratory observations on a wide range of fault rock types point to the concurrent operation of brittle/frictional (cataclastic) processes that depend linearly on effective normal stress, and rate-sensitive, plastic deformation processes (e.g., pressure solution, dislocation- or diffusion-mediated creep) (Wintsch et al., 1995; Holdsworth et al., 2001; Imber et al., 2008; Collettini et al., 2011; Siman-Tov et al., 2013; Fagereng et al., 2014; Delle-Piane et al., 2018; Verberne et al., 2019). The relation between this 'frictional-plastic' deformation of fault rock and seismogenesis, including of the competing effects between time-sensitive /-insensitive deformation processes on failure, creep, compaction, and healing....."

We thank the reviewer for the references that he/she mentioned, which we have now included. To strengthen our cause, we also mention here the work by Siman-Tov et al., (2013), Delle-Piane et al. (2018), and the review by Verberne et al. (2019), whom demonstrated the importance of frictional-plastic processes in nanogranular fault rock.

L110: since this is a review article I would give credit to the people that put the basis for the friction contact theory such as the work of Bowden and Tabor as well as Rabinowicz and not only Dieterich and Kilgore 1994.

The reviewer is right. We followed his/her suggestion by adding references to Bowden and Tabor (1950, 1964) and Rabinowicz (1956, 1958) (line 111-112).

L330: in regard to the scaling of the critical slip distance with fault thickness I think that the citation to Marone and Kilgore, 1993 Nature is needed.

This is an important result and we thank the reviewer for pointing this out. The relation between  $d_c$  and shear band thickness, which the CNS model independently arrives at, is effectively the same as what Marone and Kilgore (1993) arrived at on the basis of RSF analysis. We now mention this in line 334.

### **References NOT cited in the revised ms**

Scruggs, V. J., & Tullis, T. E. (1998). Correlation between velocity dependence of friction and strain localization in large displacement experiments on feldspar, muscovite and biotite gouge. *Tectonophysics* **295**, 15-40.

Sleep, N. H., Richardson, E., and Marone, C. (2000). Physics of friction and strain rate localization in synthetic fault gouge. *J. Geophys. Res.* **105**, B11, 25875-25890.
